# Supplementary material for: Modeling anticancer drug–DNA interactions via mixed QM/MM molecular dynamics simulations
Source: Royal Society of Chemistry journal article supplement (doi:10.1039/b604263p), 2006-01-01
Supplement: b604263p.pdf [file b604263p.pdf]

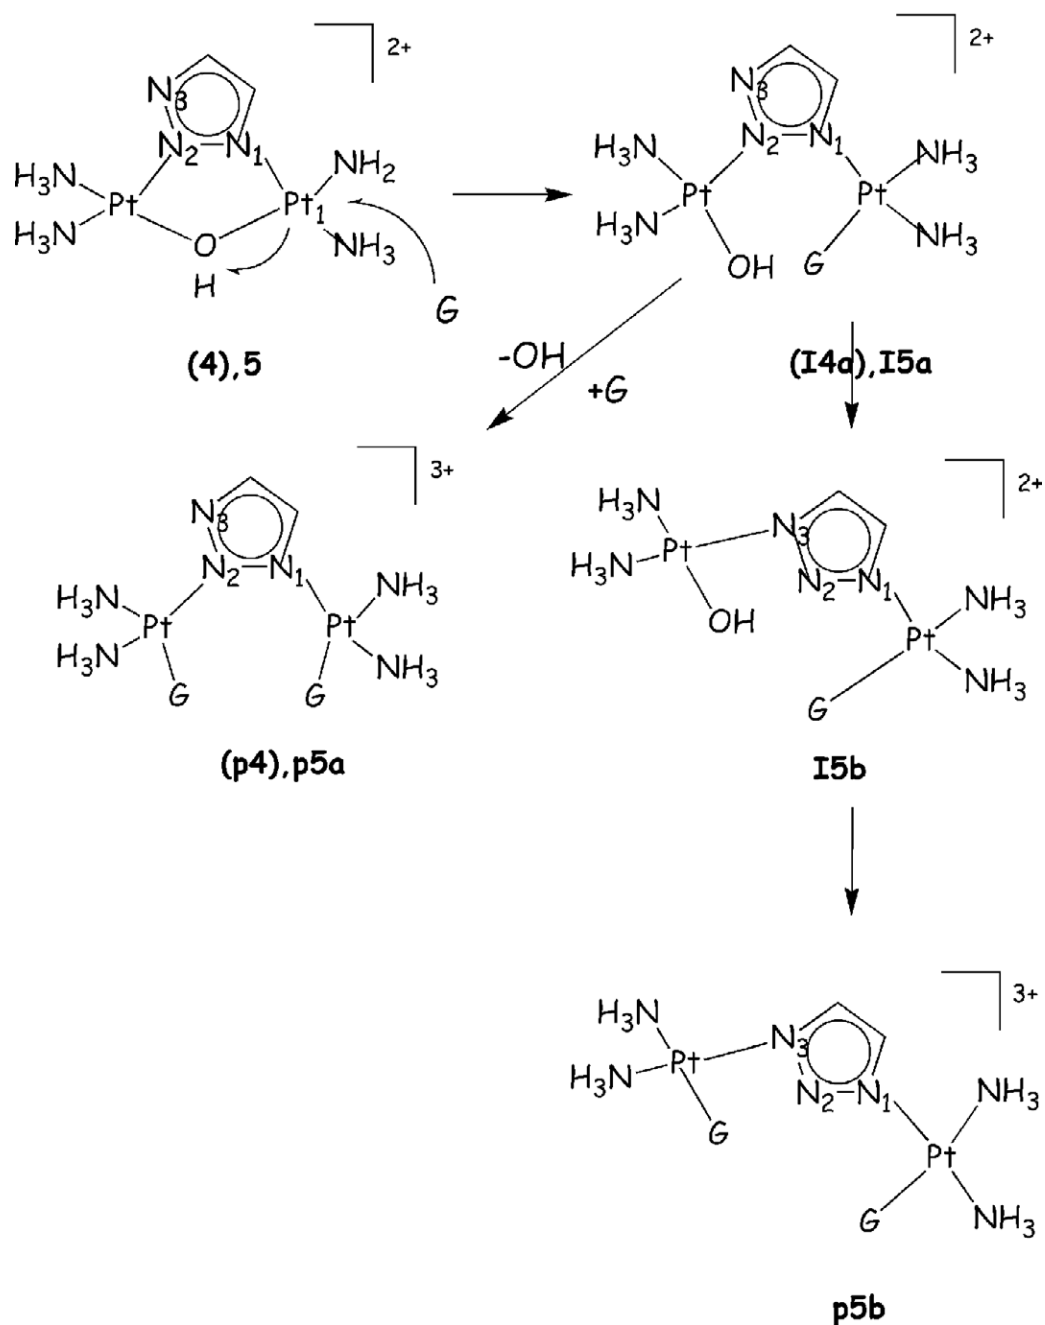

**Figure S1** Mechanism of binding of the azole bridged diplatinum drugs to guanine bases. The mechanism is shown for **5** and the corresponding compounds of **4** are indicated in parenthesis. These complexes are equivalent to the ones depicted in this picture, with N3 replaced by a C3-H group.

**Table S1:** Dihedral angles around amide link taken from classical simulation:  
 $\chi_1 = \text{C7-C8-N12-C14}$ ,  $\chi_2 = \text{C8-N12-C14-O14}$ ,  $\chi_3 = \text{N12-C14-C15-C18-C19}$ .

|          | <i>DSA NMR</i> | <i>DSI NMR</i> | <i>DSA-DNA</i> |              | <i>DSI-DNA</i> |              | <i>NBOC-DSA-DNA</i> |
|----------|----------------|----------------|----------------|--------------|----------------|--------------|---------------------|
|          | Covalent       | Covalent       | Covalent       | Non-covalent | Covalent       | Non-covalent | Non-covalent        |
| $\chi_1$ | 22.4           | 14.2           | 14.8           | 20.9         | 15.3           | 20.2         | 11.7                |
| $\chi_2$ | 11.0           | 13.5           | 13.4           | 14.4         | 20.5           | 16.9         | -2.3                |
| $\chi_3$ | 11.4           | 9.7            | 8.4            | 9.0          | 4.7            | 6.6          | -                   |
